# Supplementary material
Source: PubMed Central journal article supplement (PMC7216457)
Supplement: ONCO-25-414-s001.pdf [file ONCO-25-414-s001.pdf]

Supplemental Tables for:  
Blood-Based Next-Generation Sequencing Analysis of Appendiceal Cancers  
Walid Shaib et al.

**Supplemental Table S1:** Genes sequenced by Guardant360 and all four major classes of alterations

| <b>Point Mutations (SNVs)</b><br><b>(73 Genes)</b> | <b>Indels</b><br><b>(23 Genes)</b> | <b>Amplifications</b><br><b>(18 Genes)</b> | <b>Fusions</b><br><b>(6 Genes)</b> |
|----------------------------------------------------|------------------------------------|--------------------------------------------|------------------------------------|
| <i>AKT1</i> <i>SMO</i> <i>ARAF</i>                 | <i>ATM</i>                         | <i>AR</i>                                  | <i>ALK</i>                         |
| <i>ATM</i> <i>APC</i> <i>CCND1</i>                 | <i>ARID1A</i>                      | <i>CCND1</i>                               | <i>FGFR2</i>                       |
| <i>CCNE1</i> <i>BRCA1</i> <i>CDKN2A</i>            | <i>BRCA2</i>                       | <i>CCNE1</i>                               | <i>FGFR3</i>                       |
| <i>DDR2</i> <i>CDK4</i> <i>EZH2</i>                | <i>CDKN2A</i>                      | <i>CDK6</i>                                | <i>NTRK1</i>                       |
| <i>FGFR1</i> <i>ERBB2 (HER2)</i> <i>GNA11</i>      | <i>ERBB2</i>                       | <i>ERBB2</i>                               | <i>RET</i>                         |
| <i>GNAS</i> <i>FGFR3</i> <i>IDH2</i>               | <i>KIT</i>                         | <i>FGFR2</i>                               | <i>ROS1</i>                        |
| <i>JAK3</i> <i>HRAS</i> <i>MAP2K2/MEK2</i>         | <i>MLH1</i>                        | <i>KRAS</i>                                |                                    |
| <i>MAPK3/ERK1</i> <i>KRAS</i> <i>MTOR</i>          | <i>NF1</i>                         | <i>MYC</i>                                 |                                    |
| <i>NF1</i> <i>MLH1</i> <i>NRAS</i>                 | <i>PTEN</i>                        | <i>PIK3CA</i>                              |                                    |
| <i>RB1</i> <i>NOTCH1</i> <i>PTPN11</i>             | <i>SMAD4</i>                       | <i>BRAF</i>                                |                                    |
| <i>SMAD4</i> <i>PIK3CA</i> <i>RIT1</i>             | <i>TP53</i>                        | <i>CCND2</i>                               |                                    |
| <i>VHL</i> <i>RHEB</i> <i>TP53</i>                 | <i>VHL</i>                         | <i>CDK4</i>                                |                                    |
| <i>ALK</i> <i>STK11</i> <i>ARID1A</i>              | <i>APC</i>                         | <i>EGFR</i>                                |                                    |
| <i>BRAF</i> <i>AR</i> <i>CCND2</i>                 | <i>BRCA1</i>                       | <i>FGFR1</i>                               |                                    |
| <i>CDH1</i> <i>BRCA2</i> <i>CTNNB1</i>             | <i>CDH1</i>                        | <i>KIT</i>                                 |                                    |
| <i>EGFR</i> <i>CDK6</i> <i>FBXW7</i>               | <i>EGFR</i>                        | <i>MET</i>                                 |                                    |
| <i>FGFR2</i> <i>ESR1</i> <i>GNAQ</i>               | <i>GATA3</i>                       | <i>PDGFRA</i>                              |                                    |
| <i>HNF1A</i> <i>GATA3</i> <i>JAK2</i>              | <i>MET</i>                         | <i>RAF1</i>                                |                                    |
| <i>KIT</i> <i>IDH1</i> <i>MAPK1/ERK2</i>           | <i>MTOR</i>                        |                                            |                                    |
| <i>MET</i> <i>MAP2K1/MEK1</i> <i>MYC</i>           | <i>PDGFRA</i>                      |                                            |                                    |
| <i>NFE2L2</i> <i>MPL</i> <i>NTRK1</i>              | <i>RB1</i>                         |                                            |                                    |
| <i>PDGFRA</i> <i>NPM1</i> <i>RAF1</i>              | <i>STK11</i>                       |                                            |                                    |
| <i>RET</i> <i>RHOA</i> <i>ROS1</i>                 | <i>TSC1</i>                        |                                            |                                    |
| <i>PTEN</i> <i>TERT</i> <i>SC1</i>                 |                                    |                                            |                                    |
| <i>NTRK3</i>                                       |                                    |                                            |                                    |

**Supplemental Table S2:** Correlation between age and gender with respect to KRAS/BRAF/ATM/BRCA

| <b>Gene</b>   | <b>Count of Gene</b> | <b>Male</b> | <b>Female</b> | <b>Mean Age (Years)</b> |
|---------------|----------------------|-------------|---------------|-------------------------|
| <i>KRAS</i>   | 41                   | 21/41 (51%) | 20/41 (49%)   | 53.5                    |
| <i>BRAF</i>   | 13                   | 7/13 (54%)  | 6/13 (46%)    | 58.9                    |
| <i>ATM</i>    | 6                    | 3/6 (50%)   | 3/6 (50%)     | 51.7                    |
| <i>BRCA 1</i> | 1                    | 0/1 (0%)    | 1/1 (100%)    | 51                      |
| <i>BRCA 2</i> | 1                    | 0/1 (0%)    | 1/1 (100%)    | 60                      |
